# Supplementary material for: Clusterin overexpression in mice exacerbates diabetic phenotypes but suppresses tumor progression in a mouse melanoma model
Source: publisher site journal article supplement (doi:10.18632/aging.202788), 2021-03-10
Supplement: Supplementary file [file aging-v13i5-202788-supplementary-material-SD3.pdf]

## SUPPLEMENTARY TABLES

**Supplementary Table 1. Statistical analyses (Figure 2A).**

|                                | BRAIN  |        | LIVER  |        | INTESTINE |        | HEART  |           | MUSCLE    |           |           |
|--------------------------------|--------|--------|--------|--------|-----------|--------|--------|-----------|-----------|-----------|-----------|
|                                | TgN102 | TgG106 | TgN102 | TgG106 | TgN102    | TgG106 | TgN102 | TgG106    | TgN102    | TgG106    |           |
| Pearson Corr. <sup>1</sup>     |        | 0.521  |        | 0.619  |           | 0.758  |        | 0.349     |           | 0.542     |           |
| Pearson Corr. <sup>2</sup>     |        |        | -0.043 | Brain  | 0.186     | Liver  | -0.289 | Intestine | -0.244    | Heart     |           |
|                                |        |        |        |        | 0.265     | Brain  | -0.097 | Liver     | 0.086     | Intestine |           |
|                                |        |        |        |        |           |        | -0.258 | Brain     | 0.558     | Liver     |           |
|                                |        |        |        |        |           |        |        |           | 0.151     | Brain     |           |
| Regression<br>(F significance) |        | 0.055  |        | 0.010  |           | 0.001  |        | 0.184     |           | 0.045     |           |
|                                |        |        |        | 0.826  | Brain     | 0.323  | Liver  | 0.120     | Intestine | 0.210     | Heart     |
|                                |        |        |        |        |           | 0.172  | Brain  | 0.596     | Liver     | 0.673     | Intestine |
|                                |        |        |        |        |           |        |        | 0.184     | Brain     | 0.002     | Liver     |
|                                |        |        |        |        |           |        |        |           |           | 0.479     | Brain     |

Pearson Corr.<sup>1</sup> denotes gene expression correlation within tissue amongst the two Tg lines, and Pearson Corr.<sup>2</sup> across tissues (n=4 per mouse genotype).

Regression analysis (F significance) refers to genes studied in either Tg lines or tissues.

**Supplementary Table 2. Statistical analyses (Figure 2B).**

|                                | LIVER  | INTESTINE | HEART     | MUSCLE    |
|--------------------------------|--------|-----------|-----------|-----------|
|                                | CLU KO | CLU KO    | CLU KO    | CLU KO    |
| Pearson Corr. <sup>2</sup>     |        | -0.239    | 0.470     | -0.431    |
|                                |        | Liver     | Intestine | Heart     |
|                                |        |           | -0.086    | -0.070    |
|                                |        |           | Liver     | Intestine |
|                                |        |           |           | 0.337     |
|                                |        |           |           | Liver     |
| Regression<br>(F significance) |        | 0.370     | 0.066     | 0.094     |
|                                |        | Liver     | Intestine | Heart     |
|                                |        |           | 0.749     | 0.795     |
|                                |        |           | Liver     | Intestine |
|                                |        |           |           | 0.200     |
|                                |        |           |           | Liver     |

Pearson Corr.<sup>2</sup> across tissues (n=4 per mouse genotype).

Regression analysis (F significance) refers to genes studied in either Tg lines or tissues.

**Supplementary Table 3. Statistical analyses (Figure 3C).**

|                                | LIVER          |                | PANCREAS       |                | MUSCLE         |                |
|--------------------------------|----------------|----------------|----------------|----------------|----------------|----------------|
|                                | Tgl173 vs. Con | Tgl178 vs. Con | Tgl173 vs. Con | Tgl178 vs. Con | Tgl173 vs. Con | Tgl178 vs. Con |
| Pearson Corr. <sup>1</sup>     |                | 0.116          |                | 0.309          |                | 0.513          |
| Pearson Corr. <sup>2</sup>     |                |                |                | 0.196          | Liver          | 0.139          |
|                                |                |                |                |                |                | 0.334          |
|                                |                |                |                |                |                | Liver          |
| Regression<br>(F significance) |                | 0.656          |                | 0.226          |                | 0.192          |
|                                |                |                |                | 0.264          | Liver          | 0.606          |
|                                |                |                |                |                |                | 0.205          |
|                                |                |                |                |                |                | Liver          |

Pearson Corr.<sup>1</sup> denotes gene expression correlation within tissue amongst the two Tg lines, and Pearson Corr.<sup>2</sup> across tissues (n=4 per mouse genotype).

Regression analysis (F significance) refers to genes studied in either Tg lines or tissues.
